# Supplementary material for: Small role with big impact: miRNAs as communicators in the cross-talk between cancer-associated fibroblasts and cancer cells
Source: PubMed Central journal article supplement — Int J Biol Sci. 2017 Feb 25;13(3):339–48. doi: 10.7150/ijbs.17680 (PMC5370441; doi:10.7150/ijbs.17680), 2017-02-25
Supplement: ijbsv13p0339s1.pdf [file ijbsv13p0339s1.pdf]

**Supplement Table 1 Main findings of miRNAs dysregulation contribute to CAFs phenotype and functions.**

| Author                | Ref. | Fibroblasts source             | Studies purpose relate to CAFs                                                                                                                                    | Main findings about miRNAs desregulation in CAFs                                                                                                                                                                                                                                                                                                                     |
|-----------------------|------|--------------------------------|-------------------------------------------------------------------------------------------------------------------------------------------------------------------|----------------------------------------------------------------------------------------------------------------------------------------------------------------------------------------------------------------------------------------------------------------------------------------------------------------------------------------------------------------------|
| Au Yeung et al., 2016 | [40] | Ovarian cancer normal ovaries  | Identify miRNA signatures in exosomes isolated from ovarian cancer-associated fibroblasts (CAFs) and mechanisms by which miRNAs modulate the malignant phenotypes | <ol style="list-style-type: none"> <li>1.Exosomes from CAFs show high level of miR-21 compared to normal fibroblasts</li> <li>2.Exosome miR-21 from CAFs transferred into cancer cell and stimulate mobility, invasion and chemoresistance by targeting APAF1</li> </ol>                                                                                             |
| J.Li et al., 2016     | [66] | Lung cancer Normal lung tissue |                                                                                                                                                                   | <ol style="list-style-type: none"> <li>1.CAFs from lung cancer patient promoted resistance to cisplatin in the lung cancer cell lines A549 and 95D in a paracrine manner.</li> <li>2.SDF-1 from CAFs facilitated drug resistance via the CXCR4-mediated signaling pathway</li> <li>3.Mir-1 negatively regulated the expression level of SDF-1 in the CAFs</li> </ol> |
| J.Zhang et al., 2015  | [71] | Lung cancer Normal lung tissue | Find differential miRNAs in NFs and CAFs from lung cancer and the target genes                                                                                    | <ol style="list-style-type: none"> <li>1.MiR-101 was identified as the most downregulated miRNA in CAFs compared with NFs</li> <li>2.MiR-101 overexpression in CAFs impaired their ability to stimulate tumor cell proliferation, sphere formation migration and invasion, and enhanced apoptosis by</li> </ol>                                                      |

|                             |                                       |                                                                                                                 |                                                                                                                                                                                                                                                                                                                                                           |
|-----------------------------|---------------------------------------|-----------------------------------------------------------------------------------------------------------------|-----------------------------------------------------------------------------------------------------------------------------------------------------------------------------------------------------------------------------------------------------------------------------------------------------------------------------------------------------------|
|                             |                                       |                                                                                                                 | targeting CXCL12                                                                                                                                                                                                                                                                                                                                          |
| Al-Ansari et al., 2015 [36] | Breast cancer<br>Normal breast tissue | Identify miR-146b-5p as a downstream effector of miR-146b-5p and investigate its tumor suppressive functions    | 1.MiR-146b-5p inhibition activate breast stromal fibroblasts, ectopic expression of miR-146b-5p in active fibroblasts abrogated their pro-carcinogenic effects<br>2.MiR-146-5p-defective breast stromal fibroblasts promote EMT in breast cancer cells<br>3.Treatment of active breast stromal fibroblasts with curcumin increased miR-146b-5p expression |
| Shah et al., 2015 [72]      | Basal cell breast cancer              | Investigate the role of microRNAs secreted by CAFs in ER expression in breast cancer cells.                     | CAF's from ER-negative phenotype of breast cancer secreted hMAPK-miRNAs miR-221/222 leads to MAPK activation and repression of ER in breast cancer cells                                                                                                                                                                                                  |
| Vivacqua et al., 2015 [54]  | Breast cancer                         | Investgate the effect of estrogenic GPER signaling in CAFs in breast cancer                                     | GPER mediates the up-regulation of miR144 and the reduction of Runx1 induced by E2 and G-1 in CAFs.                                                                                                                                                                                                                                                       |
| Pang et al., 2015 [67]      | Mouse pancreat                        | Verify whether PaC cells can secrete microvesicles containing miRNA to impact tumor-adjacent normal fibroblasts | 1.NF treated with PaC-derived microvesicles containing miR-155 convert into CAF-like cells<br>2.TP53INP1 is a target of miR-155 in fibroblasts and its downregulation contribute to the fibroblasts' activation.                                                                                                                                          |
| Ali et al., 2015 [73]       | Pancreatic cancer                     | Evaluate the aberrant expression of miRNAs in CAF from pancreat cancer                                          | Inhibite miR-221 in CAFs decreased cell migration, invasion, and the expression of                                                                                                                                                                                                                                                                        |

|                              |                                         |                                                                                                          |                                                                                                                                                                                                                                                                                                                                                                          |
|------------------------------|-----------------------------------------|----------------------------------------------------------------------------------------------------------|--------------------------------------------------------------------------------------------------------------------------------------------------------------------------------------------------------------------------------------------------------------------------------------------------------------------------------------------------------------------------|
|                              |                                         |                                                                                                          | K-Ras and NF-κB                                                                                                                                                                                                                                                                                                                                                          |
| P. Li et al., [34]<br>2015   | Gastric cancer<br>Normal gastric tissue | Identify desregulated miRNAs in CAFs from GCs and investigate the underlying mechanisms                  | 1.MiR-149 is a critical factor for the transformation of NFs into CAFs in GC.<br>2.MiR-149 is an negative regulator of the pro-tumorigenesis activity of CAFs both in vitro and in vivo.<br>3.H.P. activates the COX-2/ PGE2 pathway, leading to hypermethylation of the miR-149 promoter and repression of miR-149 in human and mouse fibroblasts in vitro and in vivo. |
| Tanaka et al., [64]<br>2015  | Esophageal cancer                       | Examine the mechanism of miR27a/b-induced chemoresistance in esophageal cancer                           | MR-27a/b is involved in resistance to chemotherapy in esophageal cancer, through miR-27a/b-induced transformation of normal fibroblast into CAF                                                                                                                                                                                                                          |
| Josson et al., [57]<br>2015  | Prostate cancer                         | Understand the role of miRNAs in the biology and function of cancer associated stroma in prostate cancer | 1.Ectopic expression of miR-409 in normal prostate stromal fibroblasts induces a CAF-like phenotype.<br>2.Prostate stromal fibroblasts overexpressing miR-409 secrete EVs containing miR-409, taking up by cancer cells, and induces cancer cell proliferation and EMT in vitro and in vivo.                                                                             |
| D.Zhang et al., [20]<br>2015 | human foreskin<br>colon cancer          | Investigate role of miRNA in IDH3a mediate regulation of glycolysis in CAFs                              | MiR-424 promotes glycolysis in CAFs by downregulating IDH3a.                                                                                                                                                                                                                                                                                                             |

|                                          |                                                                                                                           |                                                                                                                    |                                                                                                                                                                                                                                                                                                          |
|------------------------------------------|---------------------------------------------------------------------------------------------------------------------------|--------------------------------------------------------------------------------------------------------------------|----------------------------------------------------------------------------------------------------------------------------------------------------------------------------------------------------------------------------------------------------------------------------------------------------------|
|                                          | tissue<br>melanoma                                                                                                        |                                                                                                                    |                                                                                                                                                                                                                                                                                                          |
| Yang et al., [70]<br>2014                | gastric cancer<br>adjacent norm in CAFs obtained from gastric cancer tissues<br>versus matched normal gastric fibroblasts | Investigated differential expression of miRNAs                                                                     | 1.miRNA-106b levels are increased in CAFs compared with NFs established from patients with GC.<br>2.High miR-106b stromal expression was associated with shorter overall survival<br>3.Knockdown of miR-106b in fibroblasts inhibit its ability to promote migration and invasion of gastric cancer cell |
| Naito, [43]<br>Sakamoto, et<br>al., 2014 | Scirrhoustype gastric cancer<br>Adjacent normal gastric tissue                                                            | Identified miRNAs in scirrhoustype GC<br>and their function and target                                             | 1.MiR-143 expression was higher in scirrhoustype GC than in non-scirrhoustype of GC<br>2.In situ hybridization and quantitative RT-PCR analysis showed that miR-143 is expressed by stromal fibroblasts                                                                                                  |
| Naito, [68]<br>Yasuno, et<br>al., 2014   | Scirrhoustype gastric cancer<br>Adjacent normal gastric tissue                                                            | Identified miRNAs in scirrhoustype GC<br>and their function and target                                             | 1.MiR-145 can be induced by treating TGF- $\beta$ , and enhanced $\alpha$ -SMA expression in both NFs and CAFs                                                                                                                                                                                           |
| Taddei et al., [35]<br>2014              | Benign prostatic hyperplasia                                                                                              | Investigated the senescent fibroblasts in prostate cancer, and effect of hypoxia associated miR-210 on fibroblasts | 1.Transfection of normal prostate fibroblasts with miR-210 caused increased $\alpha$ -SMA and collagen type I expression<br>2.CM from miR-210 transfected fibroblasts induced increased invasiveness and EMT in PC3 cancer cells                                                                         |

|                      |                                      |                                                                                                                                        |                                                                                                                                                                                                         |
|----------------------|--------------------------------------|----------------------------------------------------------------------------------------------------------------------------------------|---------------------------------------------------------------------------------------------------------------------------------------------------------------------------------------------------------|
|                      |                                      |                                                                                                                                        | 3.MiR-210 expressing senescent fibroblasts a can produce L-lactate and ketone bodies to fuel tumor cell growth                                                                                          |
|                      |                                      |                                                                                                                                        | 4.MiR-210 expressing senescent fibroblasts affect the recruitment of EPCs and HUVEC capillary morphogenesis                                                                                             |
| Donahue et al., 2014 | pancreatic ductal carcinoma          | Study the predictive value of miR-21 levels in CAFs for gemcitabine or 5-FU response in a cohort of PDAC patients from clinical trial. | 1. MiR-21 was strongly expressed in CAFs in pancreatic ductal adenocarcinoma<br>2.MiR-21 expression in CAFs was associated with decreased OS in PDAC patients who received 5 - FU, but not gemcitabine. |
| Hu et al., 2014      | Human fibroblast induced by TGF-beta | Investigate what role HK2 plays in the glycolysis in CAFs and the underlying mechanism                                                 | 1.HK2, a major isozyme contributes to aerobic glycolysis, was upregulated in CAFs<br>2.MR-182 targets the 3'UTR of HK2 and regulate HK2 expression in CAFs                                              |
| Morello et al., 2013 | Prostate cancer                      | Investigate differential miRNA expressed in extracellular vesicles released by prostate cancer cell and their effect on CAFs           | MiR-1227 overexpressed by RWPE-2 cells transfer into CAFs by Large oncosomes, and enhance CAFs migration                                                                                                |
| Nourae et al., 2013  | HGF-1 fibroblasts                    | Understand the effects of stromal miR-21 on esophageal malignant cells.                                                                | 1.MiR-21 is upregulated in esophageal cancer associated fibroblasts<br>2.S100A4 expression in HGF-1 was upregulate when transfected with miR-21 and reduced when inhibited miR-21                       |

|                            |                                                     |                                                                                                                                                                             |                                                                                                                                                                                                                                                                                                                                                                                                                                                              |
|----------------------------|-----------------------------------------------------|-----------------------------------------------------------------------------------------------------------------------------------------------------------------------------|--------------------------------------------------------------------------------------------------------------------------------------------------------------------------------------------------------------------------------------------------------------------------------------------------------------------------------------------------------------------------------------------------------------------------------------------------------------|
| Bullock et al., 2013 [39]  | MRC5 lung fibroblast<br>Primary colonic fibroblasts | Investigate the deregulated miR-21 expression in cancer stroma in CRC and its effect on cancer cells                                                                        | <ol style="list-style-type: none"> <li>1.MiR-21 expression is four-fold increased in CRC stroma compared with normal tissue, and mainly localised in fibroblast</li> <li>2.MiR-21 overexpression in fibroblasts resulted in upregulated <math>\alpha</math>-SMA expression</li> <li>3.Conditioned medium from miR-21 overexpressing fibroblasts protected CRC cells from oxaliplatin induced apoptosis and increased their proliferative capacity</li> </ol> |
| Mitra et al., 2012 [33]    | Ovarian cancer<br>Adjacent normal tissue            | Investigated whether miRNAs are involved in the overexpression of normal fibroblasts to CAFs in ovarian cancer and their function                                           | <ol style="list-style-type: none"> <li>1.Transfection of NFs with anti-miR-31, anti-miR-214, and pre-miR-155 enhanced fibroblast migration as well as the invasion and colony formation of cocultured cancer cells.</li> <li>2.CCL5 was identified as a target of miR-214 and tumor promotion ability of miRNA transfected CAFs was abolished by using anti-CCL5</li> </ol>                                                                                  |
| Bronisz et al., 2012 [51]  | mammary stromal fibroblasts                         | To investigate miR-320 regulation in mammary stromal fibroblasts and its role in the communication between fibroblasts and other compartments of the tumor microenvironment | <i>Pten</i> -miR-320- <i>Ets2</i> tumor suppressor axis in stromal fibroblasts can modulates the inter-cellular communication within the tumor microenvironment                                                                                                                                                                                                                                                                                              |
| Musumeci et al., 2011 [50] | Prostate cancer                                     | Study the role of miR-15 and miR-16 played in prostate cancer stroma and their target                                                                                       | 1.MiR-15 and miR-16 are downregulated in fibroblasts surrounding the prostate tumors                                                                                                                                                                                                                                                                                                                                                                         |

|                         |      |                                                 |                                                                                                                            |                                                                                                                                                                                           |
|-------------------------|------|-------------------------------------------------|----------------------------------------------------------------------------------------------------------------------------|-------------------------------------------------------------------------------------------------------------------------------------------------------------------------------------------|
|                         |      | Normal prostate tissue                          |                                                                                                                            | of the majority of 23 patients analyzed.                                                                                                                                                  |
|                         |      |                                                 |                                                                                                                            | 2.Downregulation of miR-15 and miR-16 in CAFs promoted tumor growth and progression through reduced repression of Fgf-2 and its receptor Fgfr1, which act on both stromal and tumor cells |
|                         |      |                                                 |                                                                                                                            | 3.Reconstitution of miR-15 and miR-16 in CAFs impaired tumor-supportive capability in vitro and in vivo.                                                                                  |
| Aprelikova et al., 2010 | [74] | Endometrial cancer<br>Normal endometrial tissue | Explore differential expression of regulatory microRNAs in the CAFs derived from human endometrial cancer and their target | MiR-31 downregulation in CAFs results in increased tumor cell motility, which is, in part, mediated by its direct targeting <i>SATB2</i> .                                                |

**Abbreviations:** 5-FU, 5-fluorouracil; CAFs, cancer-associated fibroblasts; CM, conditioned media; COX-2, cyclooxygenase-2; E2, estrogen ER, estrogen receptor; EMT, Epithelial-Mesenchymal Transition; FGF, fibroblast growth factor; GC, gastric cancer; GPER, hMAPK, hyperactive MAPK signaling; HK2, Hexokinase 2; IDH3 $\alpha$ , isocitrate dehydrogenase 3 $\alpha$ ; IL, interleukin; MAPK, mitogen activated protein kinase; miRNA, microRNA; NFs, normal fibroblasts; HPFs, human prostate fibroblasts; H.P., H pylori infection; OS, overall survival; PaC, pancreatic cancer; PDAC, pancreatic ductal carcinoma; PGE2, prostaglandin E2; TGF, transforming growth factor;  $\alpha$ -SMA, alpha-smooth muscle actin; SDF-1, stromal cell-derived factor 1.
